# Supplementary material for: New, efficient electroluminescent materials based on organometallic Ir complexes
Source: Royal Society of Chemistry journal article supplement (doi:10.1039/b103490c), 2001-01-01

Electronic Supplementary Information

New, Efficient, Electroluminescent Materials Based on Organometallic Ir Complexes

Vladimir V. Grushin, Norman Herron, Daniel D. LeCloux, William J. Marshall, Viacheslav A. Petrov, and Ying Wang

Central Research and Development, E. I. DuPont de Nemours and Co., Inc.,Experimental Station, Wilmington, DE 19880-0328

**I. X-Ray Crystal Structure Analysis of 2g.**

**2g:** tris-(2-(5-trifluoromethylpyridyl),4-trifluoromethylphenyl)iridium

CRYSTAL DATA: C40 H20 Cl F18 Ir N3, from dichloroethane, gold, prism, ~0.22 x 0.16 x 0.15mm, cubic , Pa-3 , a = 25.010(3) Å, b = 25.010(3) Å, c = 25.010(3) Å, alpha = 90.000(10) °, beta = 90.000(10) °, gamma = 90.000(10) °, Vol = 15644(3) Å3, Z = 16, T = -100.°C, Formula weight = 1112.24, Density = 1.889 g cm-3, µ(Mo) = 3.60mm-1.

DATA COLLECTION: Bruker SMART 1K CCD system, MoKalpha radiation, standard focus tube , anode power = 50kV x 40mA, crystal to plate distance = 5.0cm, 512 x 512 pixels/frame, multirun data aquisition, total scans = 9, total frames = 6170, oscillation/frame = -0.30°, exposure/frame = 10.0 sec/frame, maximum detector swing angle = -42.0°, beam center = (254.75,252.00), in plane spot width = 1.49, omega half width = 0.39, SAINT integration, 8592, hkl min/max = ( -33, 33, -33, 33, -32, 33), data collected = 244961, unique data = 6485, two-theta range = 2.82 to 56.50°, completeness to two-theta 56.50 = 100.00%, R(int) = 0.0753, SADABS correction applied.

SOLUTION AND REFINEMENT: Structure solved using XS(Shelxtl), refined using shelxtl software package, refinement by full-matrix least squares on F 2, scattering factors from Int. Tab. Vol C Tables 4.2.6.8 and 6.1.1.4, number of data = 6485, number of restraints = 0, number of parameters = 382, data/parameter ratio = 16.98, goodness-of-fit on F2 = 1.12, W = 1/[2(Fo2) + (0.048P)2 + 11.98P] where P = [2Fc2 + Max(Fo2,0)]/3, R indices[I>4sigma(I)] R1 = 0.0356, wR2 = 0.0625, R indices(all data) R1 = 0.0838, wR2 = 0.0870, max difference peak and hole = 1.487 and -1.048 e/Å3. All hydrogen atoms have been idealized as riding hydrogens.

RESULTS: This study determines the structure of tris-(2-(5-trifluoromethylpyridyl), 4-trifluoromethylphenyl)iridium for luminescent materials research. The asymmetric unit contains two - thirds of the molecule and one disordered dichloroethane solvent molecule as shown in Figure 1 with thermal ellipsoids drawn to the 50% probability level. Both iridium atoms of the asymmetric unit sit on three fold axes as does the disordered solvent molecule. The solvent molecule becomes disordered as the carbon atoms are moved off of the three-fold axis. The structure was difficult to solve for two reasons. First, the data suggested I-centering with the non-icentered reflections being much weaker. Second, space group Pa-3 is a unique case where the axes must be chosen in the correct order to give the proper cyclic permutation of the miller indices. For the drawings all of the labels marked with * are symmetry generated

atoms. For the tables symmetry generated atoms are identified by: #1 z,x,y, #2 y,z,x, #3 -y,z-1/2,-x+1/2, and #4 -z+1/2,-x,y+1/2. Besides the # notation the last integer in each atom name is the residue number 1, 2

or 3 for the solvent molecule.

Table 1. Atomic coordinates ( x 10^4) and equivalent isotropic displacement parameters (A^2 x 10^3) for **2g**. U(eq) is defined as one third of the trace of the orthogonalized Uij tensor.

________________________________________________________________

x y z U(eq)

________________________________________________________________

Ir11 913(1) 913(1) 913(1) 19(1)

N11 734(2) 1733(2) 1056(2) 25(1)

F11 1057(2) 3121(2) 2194(2) 74(1)

F21 209(2) 3043(2) 2216(2) 69(1)

C21 622(2) 2023(2) 609(2) 24(1)

F31 707(2) 2417(2) 2524(1) 73(1)

C31 557(2) 2581(2) 648(2) 31(1)

C41 577(2) 2826(2) 1138(2) 35(1)

C51 662(2) 2518(2) 1594(2) 33(1)

C61 748(2) 1976(2) 1535(2) 29(1)

C71 663(3) 2767(3) 2139(2) 48(2)

C111 178(2) 693(2) 1148(2) 24(1)

F111 -1376(2) 302(2) 2345(2) 83(2)

F121 -1411(2) -314(3) 1780(3) 126(3)

C121 124(2) 582(2) 1700(2) 24(1)

F131 -1746(2) 422(3) 1585(2) 112(2)

C131 -365(2) 428(2) 1924(2) 30(1)

C141 -811(2) 382(2) 1600(2) 33(1)

C151 -769(2) 483(2) 1057(2) 34(1)

C161 -286(2) 640(2) 834(2) 28(1)

C171 -1328(3) 206(3) 1828(3) 56(2)

Ir212 880(1) -880(1) 4120(1) 20(1)

N212 1731(2) -866(2) 4186(2) 25(1)

F212 3284(2) -1768(2) 4571(2) 68(1)

F222 2667(2) -2191(2) 4159(2) 73(1)

C222 1949(2) -367(2) 4217(2) 26(1)

F232 3252(2) -1748(2) 3721(2) 71(1)

C232 2503(2) -302(2) 4231(2) 34(1)

C242 2833(2) -748(2) 4213(2) 37(1)

C252 2601(2) -1255(2) 4185(2) 34(1)

C262 2049(2) -1296(2) 4180(2) 29(1)

C272 2948(2) -1740(3) 4157(3) 46(2)

C312 87(2) -812(2) 3994(2) 25(1)

F312 -1786(3) -247(4) 3660(5) 215(6)

C322 -70(2) -770(2) 3447(2) 27(1)

F322 -1677(2) -738(3) 3036(2) 109(2)

C332 -607(2) -725(2) 3300(2) 31(1)

F332 -1868(2) -1030(5) 3761(4) 226(6)

C342 -1000(2) -727(2) 3686(2) 36(1)

C352 -859(2) -771(2) 4225(2) 33(1)

C362 -324(2) -812(2) 4371(2) 30(1)

C372 -1576(3) -690(4) 3542(3) 57(2)

Cl403 3001(1) 3001(1) 3001(1) 74(1)

C403 2759(13) 2631(15) 2420(11) 86(9)

Cl413 2020(1) 2020(1) 2020(1) 86(1)

C413 2279(16) 2376(18) 2626(12) 107(12)

________________________________________________________________

Table 2. Bond lengths [A] and angles [deg] for **2g**.

_____________________________________________________________

Ir11-C111#1 2.007(5)

Ir11-C111#2 2.007(5)

Ir11-C111 2.007(5)

Ir11-N11#1 2.130(4)

Ir11-N11 2.130(4)

Ir11-N11#2 2.130(4)

N11-C61 1.342(6)

N11-C21 1.363(6)

F11-C71 1.332(8)

F21-C71 1.343(8)

C21-C31 1.408(7)

C21-C121#2 1.462(7)

F31-C71 1.305(7)

C31-C41 1.372(7)

C41-C51 1.392(8)

C51-C61 1.381(7)

C51-C71 1.498(8)

C111-C161 1.407(7)

C111-C121 1.415(7)

F111-C171 1.321(8)

F121-C171 1.322(9)

C121-C131 1.397(7)

C121-C21#1 1.462(7)

F131-C171 1.324(9)

C131-C141 1.383(7)

C141-C151 1.386(8)

C141-C171 1.481(8)

C151-C161 1.388(7)

Ir212-C312#3 2.015(5)

Ir212-C312 2.015(5)

Ir212-C312#4 2.015(5)

Ir212-N212#4 2.134(4)

Ir212-N212#3 2.134(4)

Ir212-N212 2.134(4)

N212-C262 1.339(6)

N212-C222 1.365(6)

F212-C272 1.334(7)

F222-C272 1.329(7)

C222-C232 1.396(7)

C222-C322#4 1.473(7)

F232-C272 1.330(8)

C232-C242 1.389(8)

C242-C252 1.394(8)

C252-C262 1.385(7)

C252-C272 1.492(8)

C312-C362 1.394(7)

C312-C322 1.429(7)

F312-C372 1.260(10)

C322-C332 1.397(7)

C322-C222#3 1.473(7)

F322-C372 1.295(9)

C332-C342 1.379(8)

F332-C372 1.248(10)

C342-C352 1.400(8)

C342-C372 1.487(8)

C352-C362 1.390(7)

Cl403-C403#1 1.83(3)

Cl403-C403#2 1.83(3)

Cl403-C403 1.83(3)

C403-C413#1 0.95(4)

C403-C413#2 1.02(4)

C403-C403#2 1.05(5)

C403-C403#1 1.05(5)

C403-C413 1.45(3)

Cl413-C413 1.87(3)

Cl413-C413#2 1.87(3)

Cl413-C413#1 1.87(3)

C413-C403#2 0.95(4)

C413-C403#1 1.02(4)

C413-C413#2 1.10(5)

C413-C413#1 1.10(5)

C111#1-Ir11-C111#2 95.66(19)

C111#1-Ir11-C111 95.65(19)

C111#2-Ir11-C111 95.66(19)

C111#1-Ir11-N11#1 91.26(18)

C111#2-Ir11-N11#1 171.85(18)

C111-Ir11-N11#1 79.33(18)

C111#1-Ir11-N11 171.84(18)

C111#2-Ir11-N11 79.33(18)

C111-Ir11-N11 91.27(18)

N11#1-Ir11-N11 94.27(15)

C111#1-Ir11-N11#2 79.32(18)

C111#2-Ir11-N11#2 91.26(18)

C111-Ir11-N11#2 171.84(18)

N11#1-Ir11-N11#2 94.27(15)

N11-Ir11-N11#2 94.27(15)

C61-N11-C21 119.7(4)

C61-N11-Ir11 125.6(3)

C21-N11-Ir11 114.7(3)

N11-C21-C31 119.6(5)

N11-C21-C121#2 113.7(4)

C31-C21-C121#2 126.7(5)

C41-C31-C21 120.0(5)

C31-C41-C51 119.4(5)

C61-C51-C41 118.5(5)

C61-C51-C71 120.4(5)

C41-C51-C71 121.0(5)

N11-C61-C51 122.5(5)

F31-C71-F11 107.9(6)

F31-C71-F21 108.1(6)

F11-C71-F21 105.6(5)

F31-C71-C51 113.1(5)

F11-C71-C51 111.9(6)

F21-C71-C51 110.0(5)

C161-C111-C121 116.6(5)

C161-C111-Ir11 128.1(4)

C121-C111-Ir11 115.3(4)

C131-C121-C111 121.9(5)

C131-C121-C21#1 121.6(5)

C111-C121-C21#1 116.5(4)

C141-C131-C121 119.5(5)

C131-C141-C151 119.9(5)

C131-C141-C171 120.3(5)

C151-C141-C171 119.7(5)

C141-C151-C161 120.7(5)

C151-C161-C111 121.4(5)

F111-C171-F121 104.6(7)

F111-C171-F131 107.7(6)

F121-C171-F131 103.6(6)

F111-C171-C141 113.8(5)

F121-C171-C141 113.2(6)

F131-C171-C141 113.1(6)

C312#3-Ir212-C312 94.81(19)

C312#3-Ir212-C312#4 94.81(19)

C312-Ir212-C312#4 94.81(19)

C312#3-Ir212-N212#4 79.74(19)

C312-Ir212-N212#4 90.58(17)

C312#4-Ir212-N212#4 172.65(18)

C312#3-Ir212-N212#3 172.66(18)

C312-Ir212-N212#3 79.74(18)

C312#4-Ir212-N212#3 90.58(17)

N212#4-Ir212-N212#3 95.30(15)

C312#3-Ir212-N212 90.58(17)

C312-Ir212-N212 172.65(18)

C312#4-Ir212-N212 79.74(18)

N212#4-Ir212-N212 95.30(15)

N212#3-Ir212-N212 95.30(15)

C262-N212-C222 119.8(4)

C262-N212-Ir212 125.4(3)

C222-N212-Ir212 114.7(3)

N212-C222-C232 120.3(5)

N212-C222-C322#4 114.3(4)

C232-C222-C322#4 125.4(5)

C242-C232-C222 119.7(5)

C232-C242-C252 119.1(5)

C262-C252-C242 118.8(5)

C262-C252-C272 121.2(5)

C242-C252-C272 120.0(5)

N212-C262-C252 122.3(5)

F222-C272-F232 106.9(6)

F222-C272-F212 106.6(6)

F232-C272-F212 106.0(5)

F222-C272-C252 112.5(5)

F232-C272-C252 112.5(6)

F212-C272-C252 111.9(5)

C362-C312-C322 116.3(5)

C362-C312-Ir212 128.4(4)

C322-C312-Ir212 115.2(4)

C332-C322-C312 121.5(5)

C332-C322-C222#3 122.5(5)

C312-C322-C222#3 116.0(4)

C342-C332-C322 120.1(5)

C332-C342-C352 119.7(5)

C332-C342-C372 121.4(6)

C352-C342-C372 118.9(5)

C362-C352-C342 120.1(5)

C352-C362-C312 122.3(5)

F332-C372-F312 104.6(9)

F332-C372-F322 104.6(8)

F312-C372-F322 103.2(8)

F332-C372-C342 114.6(7)

F312-C372-C342 113.7(7)

F322-C372-C342 114.8(6)

C403#1-Cl403-C403#2 33.4(15)

C403#1-Cl403-C403 33.4(15)

C403#2-Cl403-C403 33.4(15)

C413#1-C403-C413#2 68(4)

C413#1-C403-C403#2 61(4)

C413#2-C403-C403#2 89(3)

C413#1-C403-C403#1 93(3)

C413#2-C403-C403#1 55(3)

C403#2-C403-C403#1 59.998(11)

C413#1-C403-C413 49(3)

C413#2-C403-C413 49(3)

C403#2-C403-C413 40.6(19)

C403#1-C403-C413 45(2)

C413#1-C403-Cl403 133(4)

C413#2-C403-Cl403 126(3)

C403#2-C403-Cl403 73.3(8)

C403#1-C403-Cl403 73.3(7)

C413-C403-Cl403 102.3(19)

C413-Cl413-C413#2 34.1(17)

C413-Cl413-C413#1 34.1(17)

C413#2-Cl413-C413#1 34.1(17)

C403#2-C413-C403#1 64(4)

C403#2-C413-C413#2 90(3)

C403#1-C413-C413#2 53(3)

C403#2-C413-C413#1 59(4)

C403#1-C413-C413#1 87(3)

C413#2-C413-C413#1 59.996(10)

C403#2-C413-C403 46(3)

C403#1-C413-C403 46(2)

C413#2-C413-C403 44(2)

C413#1-C413-C403 40.7(18)

C403#2-C413-Cl413 131(4)

C403#1-C413-Cl413 125(3)

C413#2-C413-Cl413 73.0(9)

C413#1-C413-Cl413 73.0(9)

C403-C413-Cl413 102(2)

_____________________________________________________________

Symmetry transformations used to generate equivalent atoms:

#1 z,x,y #2 y,z,x #3 -y,z-1/2,-x+1/2 #4 -z+1/2,-x,y+1/2

Table 3. Anisotropic displacement parameters (A^2 x 10^3) for **2g**. The anisotropic displacement factor exponent takes the form: -2 pi^2 [ h^2 a*^2 U11 + ... + 2 h k a* b* U12 ]

_______________________________________________________________________

U11 U22 U33 U23 U13 U12

_______________________________________________________________________

Ir11 19(1) 19(1) 19(1) 0(1) 0(1) 0(1)

N11 24(2) 26(2) 25(2) -2(2) -1(2) 0(2)

F11 107(4) 55(3) 61(3) -26(2) -23(3) -9(3)

F21 89(3) 67(3) 50(2) -22(2) 0(2) 31(2)

C21 23(2) 28(3) 22(2) 2(2) 1(2) -3(2)

F31 151(5) 45(2) 23(2) -3(2) -9(2) 23(3)

C31 34(3) 27(3) 30(3) 6(2) -1(2) 0(2)

C41 43(3) 27(3) 35(3) -3(2) -3(3) 3(2)

C51 42(3) 30(3) 28(3) -8(2) -3(2) 5(2)

C61 36(3) 29(3) 22(3) -3(2) 0(2) 2(2)

C71 78(5) 34(3) 33(3) -9(3) -8(3) 7(3)

C111 20(2) 25(2) 28(3) -3(2) 1(2) 1(2)

F111 40(2) 157(5) 53(3) -16(3) 16(2) -32(3)

F121 115(5) 118(5) 145(6) -43(4) 66(4) -79(4)

C121 24(2) 26(3) 23(2) -1(2) 0(2) 0(2)

F131 25(2) 231(8) 79(3) 25(4) 4(2) -5(3)

C131 26(3) 35(3) 28(3) -2(2) 6(2) -2(2)

C141 26(3) 36(3) 37(3) -6(2) 5(2) -6(2)

C151 29(3) 42(3) 33(3) -1(2) -9(2) -2(2)

C161 22(2) 31(3) 31(3) -4(2) -4(2) -2(2)

C171 31(3) 88(6) 47(4) -11(4) 5(3) -20(4)

Ir212 20(1) 20(1) 20(1) 0(1) 0(1) 0(1)

N212 23(2) 28(2) 24(2) -1(2) -2(2) 0(2)

F212 51(2) 78(3) 74(3) -4(2) -22(2) 34(2)

F222 48(2) 39(2) 131(4) -3(2) -10(3) 15(2)

C222 28(3) 27(3) 22(2) 4(2) 0(2) -1(2)

F232 63(3) 81(3) 70(3) -9(2) 17(2) 31(2)

C232 28(3) 36(3) 37(3) 5(2) -4(2) -7(2)

C242 25(3) 51(4) 34(3) 0(3) -1(2) -3(2)

C252 30(3) 40(3) 33(3) 1(2) -1(2) 9(2)

C262 31(3) 30(3) 28(3) 0(2) -2(2) 7(2)

C272 32(3) 47(4) 60(4) -6(3) -6(3) 11(3)

C312 23(2) 21(2) 32(3) -3(2) -2(2) -1(2)

F312 77(4) 241(10) 327(13) -182(10) -108(6) 101(6)

C322 25(3) 27(3) 30(3) 0(2) -3(2) 0(2)

F322 36(2) 207(7) 83(4) -8(4) -22(2) 8(3)

C332 27(3) 37(3) 29(3) 1(2) -4(2) -2(2)

F332 41(3) 411(16) 226(9) 217(11) -41(4) -69(6)

C342 25(3) 36(3) 47(3) 0(3) -1(2) 0(2)

C352 31(3) 31(3) 38(3) -3(2) 6(2) 1(2)

C362 29(3) 30(3) 31(3) -4(2) 2(2) 0(2)

C372 29(3) 87(6) 55(4) 4(4) -2(3) 5(4)

Cl403 74(1) 74(1) 74(1) -20(1) -20(1) -20(1)

Cl413 86(1) 86(1) 86(1) -27(1) -27(1) -27(1)

_______________________________________________________________________

Table 4. Hydrogen coordinates ( x 10^4) and isotropic displacement parameters (A^2 x 10^3) for **2g**.

________________________________________________________________

x y z U(eq)

________________________________________________________________

H3A1 500 2788 335 37

H4A1 533 3202 1166 42

H6A1 820 1767 1844 35

H13A1 -390 356 2296 36

H15A1 -1075 444 835 41

H16A1 -268 712 462 34

H23A2 2654 46 4253 40

H24A2 3211 -709 4220 44

H26A2 1891 -1641 4171 35

H33A2 -701 -694 2933 37

H35A2 -1129 -773 4493 40

H36A2 -236 -840 4739 36

________________________________________________________________

Table 5. Torsion angles [deg] for **2g**.

________________________________________________________________

C111#1-Ir11-N11-C61 -130.9(12)

C111#2-Ir11-N11-C61 176.6(5)

C111-Ir11-N11-C61 81.1(4)

N11#1-Ir11-N11-C61 1.7(4)

N11#2-Ir11-N11-C61 -92.9(3)

C111#1-Ir11-N11-C21 46.1(14)

C111#2-Ir11-N11-C21 -6.4(3)

C111-Ir11-N11-C21 -102.0(4)

N11#1-Ir11-N11-C21 178.7(3)

N11#2-Ir11-N11-C21 84.0(4)

C61-N11-C21-C31 4.3(7)

Ir11-N11-C21-C31 -172.9(4)

C61-N11-C21-C121#2 -175.8(4)

Ir11-N11-C21-C121#2 7.0(5)

N11-C21-C31-C41 -3.8(8)

C121#2-C21-C31-C41 176.4(5)

C21-C31-C41-C51 0.1(9)

C31-C41-C51-C61 2.9(9)

C31-C41-C51-C71 -177.4(6)

C21-N11-C61-C51 -1.2(8)

Ir11-N11-C61-C51 175.6(4)

C41-C51-C61-N11 -2.4(9)

C71-C51-C61-N11 177.9(6)

C61-C51-C71-F31 -5.4(9)

C41-C51-C71-F31 175.0(6)

C61-C51-C71-F11 116.7(6)

C41-C51-C71-F11 -63.0(8)

C61-C51-C71-F21 -126.3(6)

C41-C51-C71-F21 54.1(8)

C111#1-Ir11-C111-C161 -85.7(4)

C111#2-Ir11-C111-C161 10.6(5)

N11#1-Ir11-C111-C161 -175.9(5)

N11-Ir11-C111-C161 90.0(5)

N11#2-Ir11-C111-C161 -137.3(11)

C111#1-Ir11-C111-C121 94.6(5)

C111#2-Ir11-C111-C121 -169.1(4)

N11#1-Ir11-C111-C121 4.4(4)

N11-Ir11-C111-C121 -89.7(4)

N11#2-Ir11-C111-C121 43.0(14)

C161-C111-C121-C131 -0.2(7)

Ir11-C111-C121-C131 179.5(4)

C161-C111-C121-C21#1 178.2(4)

Ir11-C111-C121-C21#1 -2.1(6)

C111-C121-C131-C141 0.1(8)

C21#1-C121-C131-C141 -178.2(5)

C121-C131-C141-C151 0.6(8)

C121-C131-C141-C171 178.5(6)

C131-C141-C151-C161 -1.1(9)

C171-C141-C151-C161 -179.0(6)

C141-C151-C161-C111 1.0(8)

C121-C111-C161-C151 -0.4(8)

Ir11-C111-C161-C151 180.0(4)

C131-C141-C171-F111 24.6(10)

C151-C141-C171-F111 -157.5(6)

C131-C141-C171-F121 -94.6(8)

C151-C141-C171-F121 83.3(8)

C131-C141-C171-F131 147.9(6)

C151-C141-C171-F131 -34.2(9)

C312#3-Ir212-N212-C262 85.1(4)

C312-Ir212-N212-C262 -137.6(13)

C312#4-Ir212-N212-C262 179.9(4)

N212#4-Ir212-N212-C262 5.4(4)

N212#3-Ir212-N212-C262 -90.5(3)

C312#3-Ir212-N212-C222 -97.4(4)

C312-Ir212-N212-C222 39.9(15)

C312#4-Ir212-N212-C222 -2.6(3)

N212#4-Ir212-N212-C222 -177.1(3)

N212#3-Ir212-N212-C222 87.1(4)

C262-N212-C222-C232 1.3(7)

Ir212-N212-C222-C232 -176.4(4)

C262-N212-C222-C322#4 -178.9(4)

Ir212-N212-C222-C322#4 3.4(5)

N212-C222-C232-C242 0.1(8)

C322#4-C222-C232-C242 -179.7(5)

C222-C232-C242-C252 -0.5(8)

C232-C242-C252-C262 -0.5(8)

C232-C242-C252-C272 179.2(6)

C222-N212-C262-C252 -2.3(8)

Ir212-N212-C262-C252 175.1(4)

C242-C252-C262-N212 1.9(8)

C272-C252-C262-N212 -177.8(5)

C262-C252-C272-F222 -3.5(9)

C242-C252-C272-F222 176.9(6)

C262-C252-C272-F232 117.4(6)

C242-C252-C272-F232 -62.3(8)

C262-C252-C272-F212 -123.4(6)

C242-C252-C272-F212 56.9(8)

C312#3-Ir212-C312-C362 4.9(5)

C312#4-Ir212-C312-C362 -90.3(4)

N212#4-Ir212-C312-C362 84.7(5)

N212#3-Ir212-C312-C362 179.9(5)

N212-Ir212-C312-C362 -132.2(13)

C312#3-Ir212-C312-C322 -173.9(4)

C312#4-Ir212-C312-C322 90.9(5)

N212#4-Ir212-C312-C322 -94.1(4)

N212#3-Ir212-C312-C322 1.2(4)

N212-Ir212-C312-C322 49.1(15)

C362-C312-C322-C332 0.5(7)

Ir212-C312-C322-C332 179.4(4)

C362-C312-C322-C222#3 -178.7(4)

Ir212-C312-C322-C222#3 0.3(6)

C312-C322-C332-C342 -0.6(8)

C222#3-C322-C332-C342 178.5(5)

C322-C332-C342-C352 0.3(8)

C322-C332-C342-C372 -179.0(6)

C332-C342-C352-C362 0.1(8)

C372-C342-C352-C362 179.4(6)

C342-C352-C362-C312 -0.2(8)

C322-C312-C362-C352 -0.1(7)

Ir212-C312-C362-C352 -178.8(4)

C332-C342-C372-F332 131.1(10)

C352-C342-C372-F332 -48.1(12)

C332-C342-C372-F312 -108.6(10)

C352-C342-C372-F312 72.1(11)

C332-C342-C372-F322 10.0(11)

C352-C342-C372-F322 -169.3(7)

C403#1-Cl403-C403-C413#1 -79(4)

C403#2-Cl403-C403-C413#1 -16(4)

C403#1-Cl403-C403-C413#2 13(4)

C403#2-Cl403-C403-C413#2 76(3)

C403#1-Cl403-C403-C403#2 -62.9(3)

C403#2-Cl403-C403-C403#1 62.9(3)

C403#1-Cl403-C403-C413 -34(2)

C403#2-Cl403-C403-C413 29(2)

C413#1-C403-C413-C403#2 92(7)

C413#2-C403-C413-C403#2 -173(6)

C403#1-C403-C413-C403#2 -95(3)

Cl403-C403-C413-C403#2 -45(3)

C413#1-C403-C413-C403#1 -173(6)

C413#2-C403-C413-C403#1 -78(6)

C403#2-C403-C413-C403#1 95(3)

Cl403-C403-C413-C403#1 50(2)

C413#1-C403-C413-C413#2 -95(3)

C403#2-C403-C413-C413#2 173(6)

C403#1-C403-C413-C413#2 78(6)

Cl403-C403-C413-C413#2 128(4)

C413#2-C403-C413-C413#1 95(3)

C403#2-C403-C413-C413#1 -92(7)

C403#1-C403-C413-C413#1 173(6)

Cl403-C403-C413-C413#1 -137(4)

C413#1-C403-C413-Cl413 -45(3)

C413#2-C403-C413-Cl413 50(2)

C403#2-C403-C413-Cl413 -137(5)

C403#1-C403-C413-Cl413 128(4)

Cl403-C403-C413-Cl413 177.9(18)

C413#2-Cl413-C413-C403#2 -75(4)

C413#1-Cl413-C413-C403#2 -12(4)

C413#2-Cl413-C413-C403#1 10(3)

C413#1-Cl413-C413-C403#1 73(3)

C413#1-Cl413-C413-C413#2 63.1(3)

C413#2-Cl413-C413-C413#1 -63.1(3)

C413#2-Cl413-C413-C403 -34(2)

C413#1-Cl413-C413-C403 29(2)

________________________________________________________________

Symmetry transformations used to generate equivalent atoms:

#1 z,x,y #2 y,z,x #3 -y,z-1/2,-x+1/2 #4 -z+1/2,-x,y+1/2


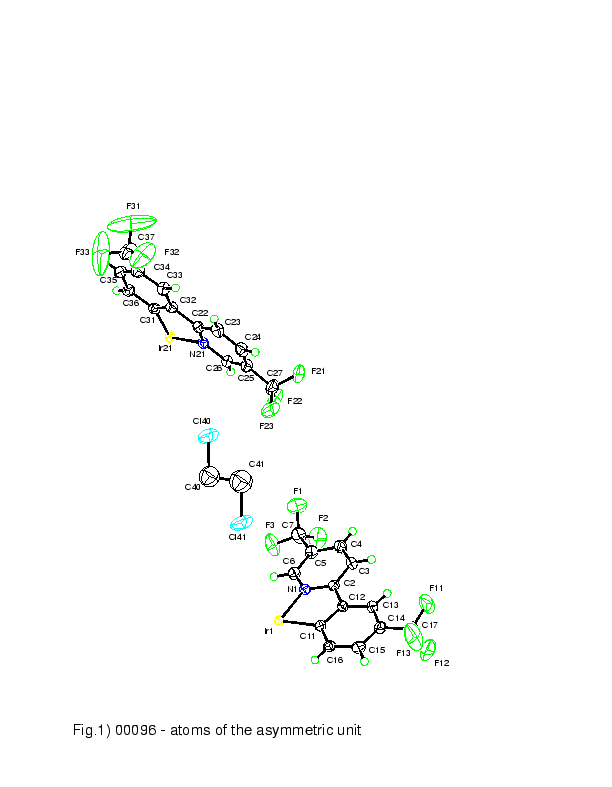


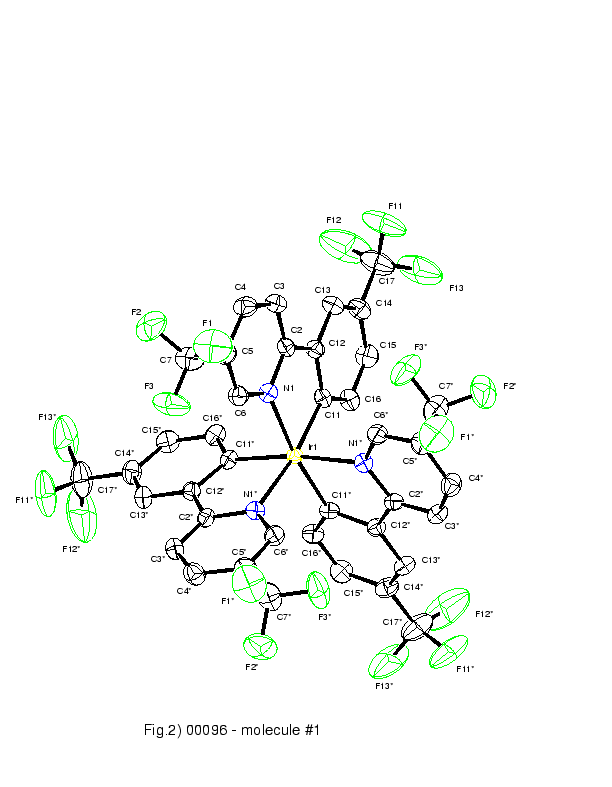


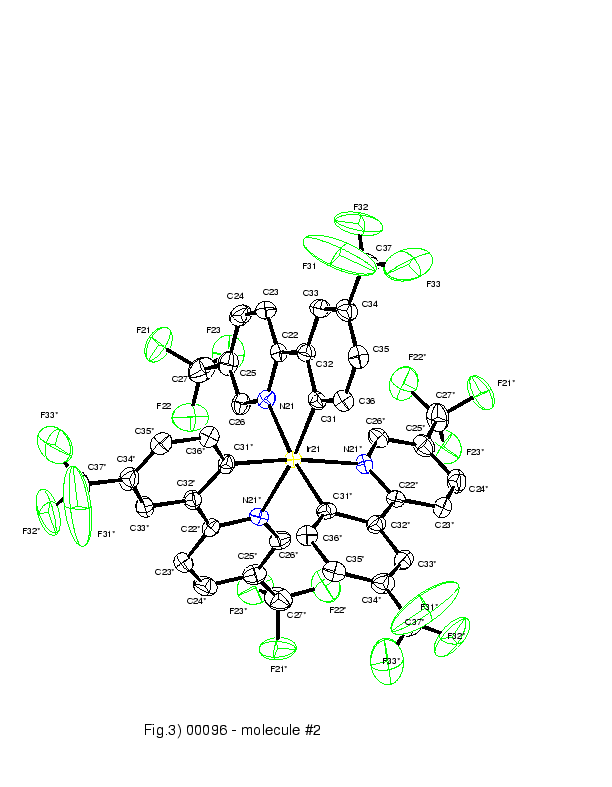

Supplement: b103490c1.doc [file b103490c1.doc]
