# Supplementary material for: New, efficient electroluminescent materials based on organometallic Ir complexes
Source: Royal Society of Chemistry journal article supplement (doi:10.1039/b103490c), 2001-01-01
Supplement: b103490cX.doc [file b103490cX.doc]

**V. Electrochemical Studies.**

CV Measurements were carried out under N2 with an EG&G 263A potentiostat. A three electrode configuration was used, consisting of a 1.75 mm2 Pt working electrode, a Ag/AgNO3 (0.1 M in MeCN) reference electrode, and a Pt wire counter electrode. A 0.5 M solution of Bu4NPF6, triply recrystallized from acetone, was used as supporting electrolyte. Solute samples were typically 1-2 mM. Scan rate profiles were conducted for each sample at scan speeds of 100-500 mV s-1, and compared to that obtained for ferrocene (Cp2Fe) under identical conditions. In general, both the oxidation and reduction waves for these Ir complexes exhibited peak-to-peak separations (Ep) ≤ to that observed for [Cp2Fe]/[Cp2Fe]+. All cyclic voltammograms were externally referenced to [Cp2Fe]/[Cp2Fe]+, for which E1/2 = 165 mV in THF and 190 mV in CH2Cl2.

**VI. EL Studies.**

The deposition chamber used is capable of depositing five different films without the need to break up the vacuum. The base vacuum used for the deposition was in the range of 10-6 torr (Edward Auto 306 evaporator with oil diffusion pump). A pre-cleaned indium tin oxide (ITO) coated glass substrate was used as the anode. Two types of ITO were used: (i) ITO-1: ITO from Colorado Concept Coating, 15 ohms/square, patterned by etching in 1 N HCl and (ii) ITO-2: patterned ITO from Thin Film Devices, Corning 1737 glass with 1400Å ITO, 30 ohms/square, 80% transmission. Higher efficiency was typically obtained with ITO-2. The patterned ITO substrates were first cleaned ultrasonically in aqueous detergent solution, rinsed with distilled water, followed by i-PrOH, and then degreased in toluene vapor. They were further cleaned with oxygen plasma for ca. 5-10 minutes prior to sequential deposition of multiple layers of thin films by thermal evaporation. Patterned Al electrodes were deposited through a mask. The thickness of the film was measured during the deposition using a quartz crystal monitor (Sycon STC-200). All film thickness data reported are nominal, calculated assuming the density of the material deposited to be one. The completed OLED device was taken out of the vacuum chamber and characterized immediately without encapsulation. The active area of the LED area was about 0.1 cm2.

A typical device configuration used in the study is shown below, e.g., with bis(4-(N,N-diethylamino)-2-methylphenyl)(4-methylphenyl)methane (MPMP) used as the hole transport material, 4,7-diphenyl-1,10-phenanthroline (DPA) as the electron transport material, and 2h as the luminescent material. The proposed energy levels for the molecules are based on cyclic voltammetry measurements.

The I-V curves of the OLED samples were measured with a Keithley Source-Measurement Unit Model 237. The electroluminescence radiance (Cd m-2) vs. voltage was measured with a Minolta LS-110 luminescence meter with a N0.122 close-up lens. The electroluminescence spectra were obtained with a Princeton Applied Research OMAIII multichannel detector.
